# Supplementary material for: Sugar Matters: Improving In Vivo Clearance Rate of Highly Glycosylated Recombinant Plasma Proteins for Therapeutic Use
Source: PubMed Central journal article supplement (PMC7826800; doi:10.3390/ph14010054), 2021-01-11
Supplement: pharmaceuticals-14-00054-s001.pdf [file pharmaceuticals-14-00054-s001.pdf]

## Supplemental Material

**Antigen and active C1-INH ELISA.** The antigen and active levels of rC1-INH were measured using ELISA as described before [1,2]. In short, C1-INH was bound to mAb RII against human C1-INH, coated on Maxisorp™ plates (Nunc, USA), and detected with biotinylated C1s. Notably, this assay is an end-stage assay, that measures the number of functional C1-INH molecules rather than the kinetics of the interaction between C1s and C1-INH. C1-INH multimers were detected in an ELISA with mAb RII both as coating and as detecting antibody. Maximally multimerized plasma derived C1-INH was used as standard and set to 100 arbitrary units (AU). PBS/0.1% Tween was used as the buffer for all incubation steps in the ELISAs.

**Kinetic analyses of protease inhibition:** Inhibition of proteases C1s, FXIIa, kallikrein and plasmin by rC1-INH was studied using chromogenic assays under pseudo-first order conditions as described earlier [1]. In brief, a fixed concentration of protease was added to varying rC1-INH concentrations in the presence of relevant chromogenic substrate in 96 wells microtiter plates and absorbance at 405 nm was measured for up to 5 hours using Thermo Scientific Multiskan GO plate reader, maintained at 37° C. All wells were layered with 25 µl mineral oil to prevent evaporation. Phosphate buffer saline (pH 7.4) with 0.1% Tween-20 was used as the assay buffer. All measurements were performed in duplicate and repeated thrice. rC1-INH sample concentrations were ascertained using absorbance at 280 nm. Progress curves obtained for the various conditions were fitted to the integrated rate equation for slow binding inhibition  $A = v_s t + (v_0 - v_s)(1 - e^{-k_{obs} t})/k_{obs} + A_0$ , where A is absorbance at 405 nm,  $v_0$  is the initial rate,  $v_s$  is the final steady state rate,  $t$  is time, and  $k_{obs}$  is the apparent rate constant, by nonlinear regression analysis. (add ref). Plots of  $k_{obs}$  values against inhibitor concentration [I] were used to obtain the association rate constant ( $k_{on}$ ) using the relationship  $k_{obs} = k_{off} + k_{on} [I]/(1+[S]/K_m)$ , where  $k_{off}$  is the dissociation rate constant, [S] is the concentration of substrate used and  $K_m$  is the Michaelis-Menten constant for a given protease – substrate pair.  $K_m$  values were obtained separately for each substrate – protease pair under the present experimental conditions. All data was analyzed using GraphPad Prism (GraphPad Software, Inc. USA).

**Preparation of N-glycan alditols released from rC1-INH and RCA<sub>120</sub> depleted rC1-INH.** N-glycan were released from rC1-INH and RCA<sub>120</sub> depleted rC1-INH and reduced as previously described [3]. In brief, 20 µg of rC1-INH protein were applied to the hydrophobic Immobilon-P PVDF membrane in a 96-well plate format. Protein denaturation was achieved by applying 75 µL denaturation mix (72.5 µL 8 M GuHCl and 2.5 µL 200 mM DTT) in each well, followed by shaking for 15 min and incubating at 60°C in a moisture box for 30 min. Subsequently the unbound material was removed. N-glycans were released by adding PNGase F (2 U of enzyme diluted with water to 15 µL) to each well and incubating overnight at 37°C. Released N-glycans were collected from the PVDF plate by centrifugation, and the glycosylamine forms of the released N-glycans were hydrolyzed by adding 20 µL of 100 mM ammonium acetate (pH 5) and incubating at RT for 1 h, followed by drying in a vacuum centrifuge (Eppendorf, Hamburg, Germany) at 35°C. Collected N-glycans were then reduced and desalted followed by a PGC clean-up [3,4]. Samples were dried by vacuum centrifugation in polymerase chain reaction (PCR) plates and dissolved in 10 µL of water for PGC nano-LC-ESI-MS/MS analysis.

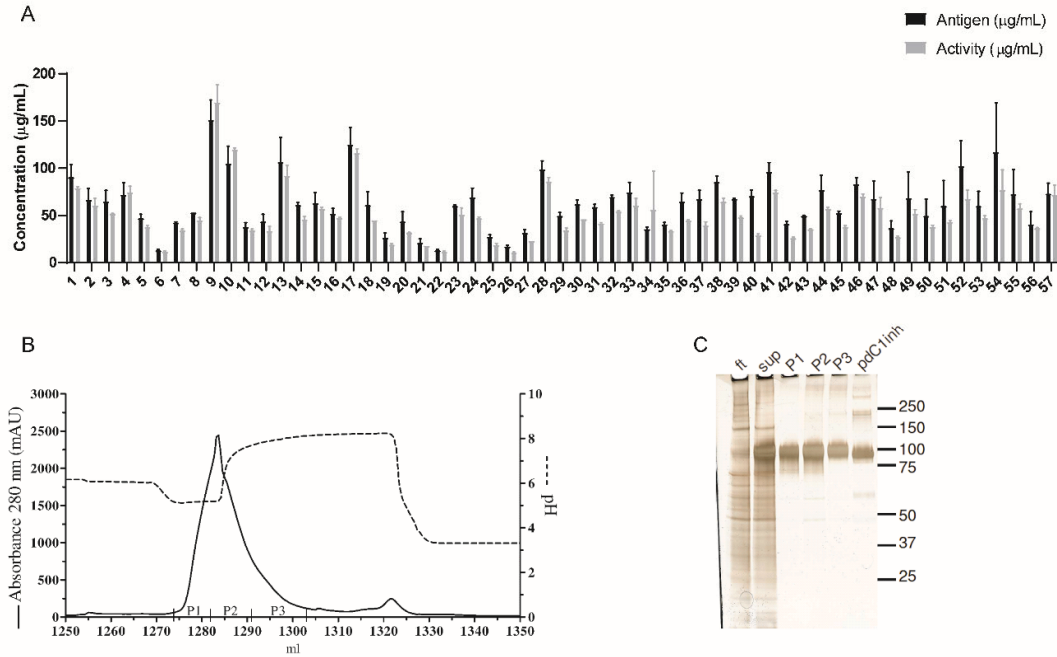

**Sup Figure 1: Expression levels and purification of rC1-INH by CHO-cells.** (a) Expression levels of rC1-INH antigen and activity of each of the 57 different CHO-cell clones. (b) Elution profile of rC1-INH produced by clone 17 on a CM FF Sepahrose column. Solid line: absorbance at 280nm; dashed line: pH changes; P1, P2, P3: peak fractions collected separately. (c) SDS-PAGE analysis of protein purity at different steps of purification. For comparison pdC1-INH profile is also shown. 'ft' = flow through; 'sup' = supernatant (the start material), P1, P2 and P3 = the three different fractions collected in (B) after buffer exchange to trisodium citrate buffer.

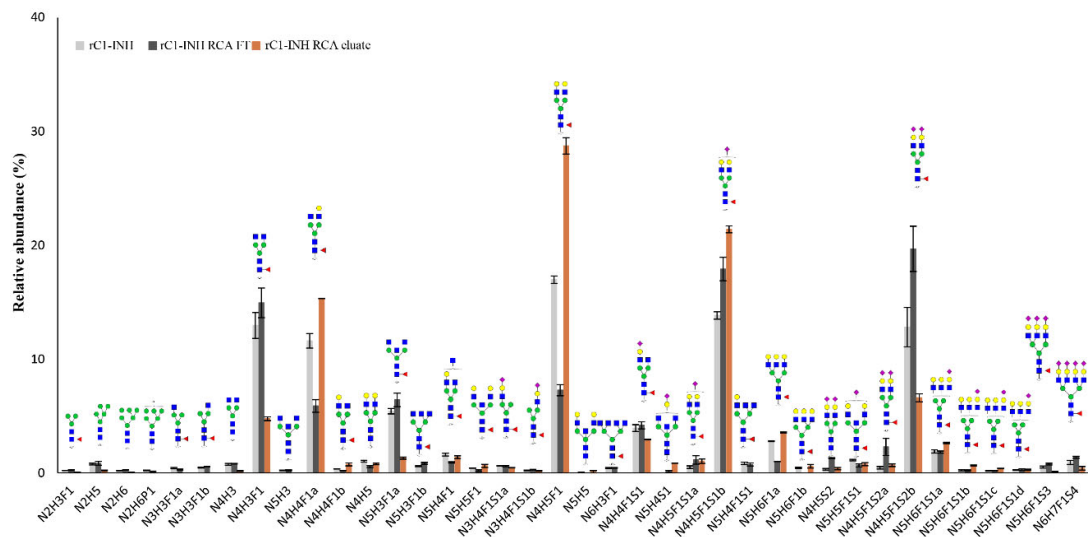

**Sup Figure 2: Relative quantification of top 40 most abundant N-glycans derived from rC1-INH, rC1-INH RCA FT and rC1-INH RCA eluate on PGC nano-LC-ESI-MS/MS (Relates to Fig. 3a). Relative abundance of individual N-glycan derived from 20  $\mu\text{g}$  rC1-INH in three samples on PGC nano-LC-ESI-**

MS/MS in negative ion mode (displayed as mean relative abundance plus standard deviation; N=3). Blue square: *N*-acetylglucosamine, yellow circle: galactose, green circle: mannose, red triangle: fucose, pink diamond: *N*-acetylneuraminic acid, H: hexose, N: *N*-acetylhexosamines, F: fucose, S: *N*-acetylneuraminic acid. a, b, c, d: different isomer format.

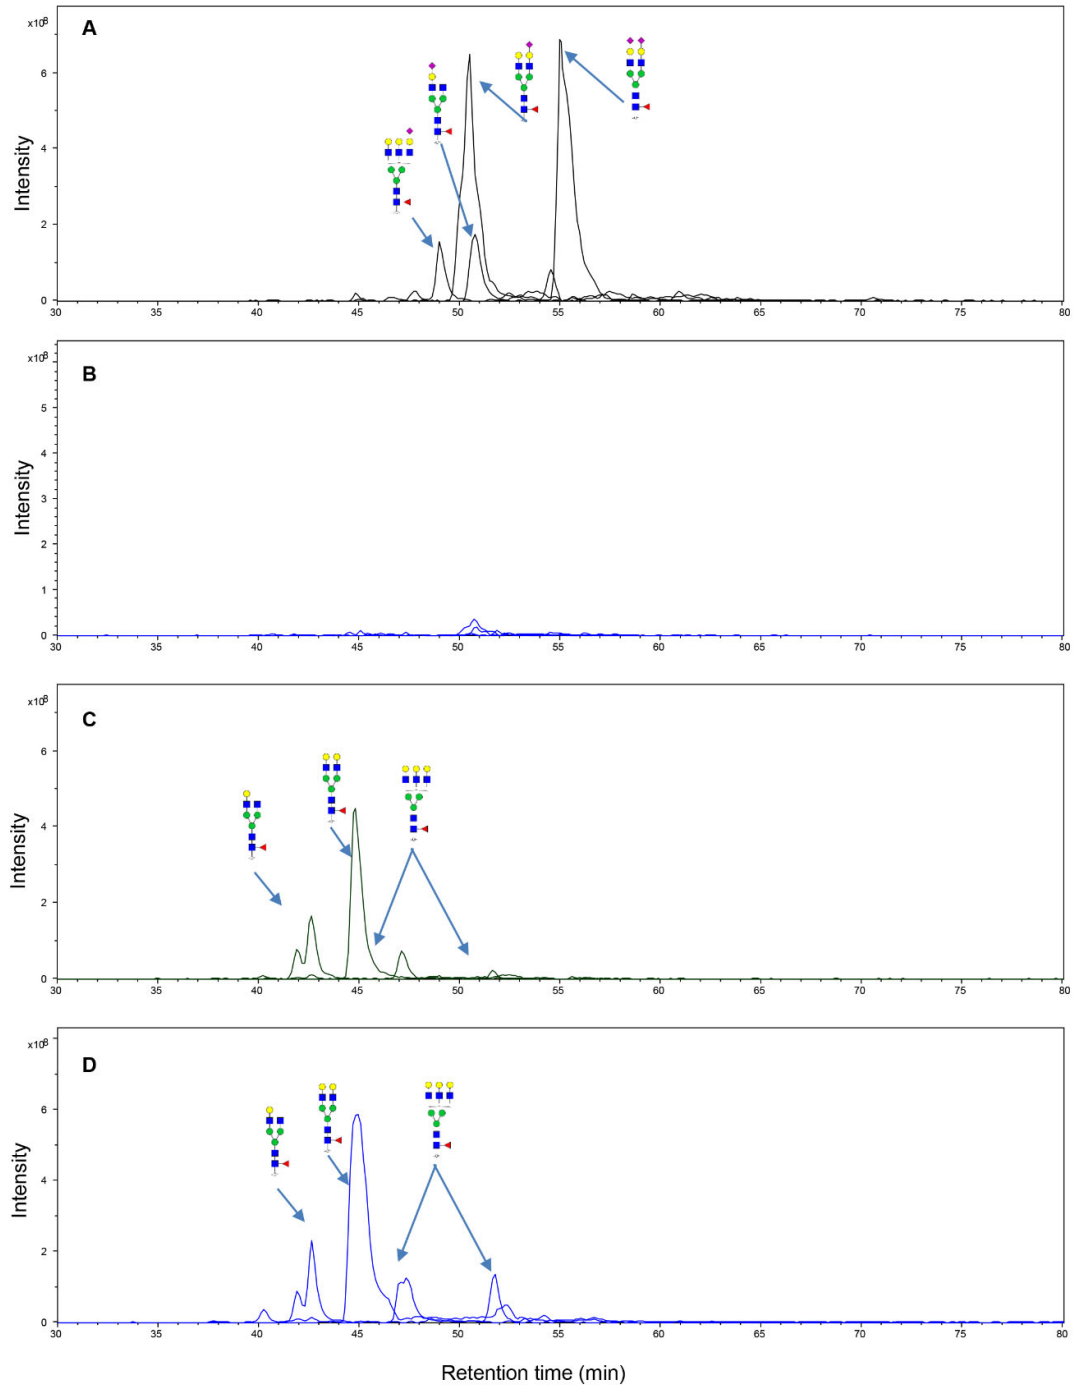

**Sup Figure. 3: Analysis of *N*-glycans with sialic acids derived from rC1-INH with and without sialidase S treatment.** (a) Combined EICs of *N*-glycans with sialic acid derived from rC1-INH before sialidase S treatment. (b) Combined EICs of *N*-glycans with sialic acid derived from rC1-INH after sialidase S

treatment. **(c)** Combined EICs of *N*-glycans without sialic acid (potential products after sialidase S treatment) derived from rC1-INH before sialidase S treatment. **(d)** Combined EICs of *N*-glycans without sialic acid (potential products after sialidase S treatment) derived from rC1-INH after sialidase S treatment. Blue square: *N*-acetylglucosamine, yellow circle: galactose, green circle: mannose, red triangle: fucose, pink diamond: *N*-acetylneuraminic acid.

1. Bos, I.G.; de Bruin, E.C.; Karuntu, Y.A.; Modderman, P.W.; Eldering, E.; Hack, C.E. Recombinant human c1-inhibitor produced in *pichia pastoris* has the same inhibitory capacity as plasma c1-inhibitor. *Biochim Biophys Acta* **2003**, *1648*, 75-83.
2. Bos, I.G.; van Mierlo, G.J.; Bleeker, W.K.; Rigter, G.M.; te Velthuis, H.; Dickneite, G.; Hack, C.E. The potentiation of human c1-inhibitor by dextran sulphate is transient in vivo: Studies in a rat model. *Int Immunopharmacol* **2001**, *1*, 1583-1595.
3. Zhang, T.; Madunic, K.; Holst, S.; Zhang, J.; Jin, C.; Ten Dijke, P.; Karlsson, N.G.; Stavenhagen, K.; Wuhrer, M. Development of a 96-well plate sample preparation method for integrated n- and o-glycomics using porous graphitized carbon liquid chromatography-mass spectrometry. *Mol Omics* **2020**.
4. Jensen, P.H.; Karlsson, N.G.; Kolarich, D.; Packer, N.H. Structural analysis of n- and o-glycans released from glycoproteins. *Nat Protoc* **2012**, *7*, 1299-1310.
